# Supplementary material for: Simultaneous enhancement of charge density and molecular stacking order of polymer semiconductors by viologen dopants for high performance organic field-effect transistors
Source: Royal Society of Chemistry journal article supplement (doi:10.1039/c8tc01076e), 2018-01-01
Supplement: c8tc01076e1.pdf [file c8tc01076e1.pdf]

**- Supporting Information -**

**Simultaneous Enhancement of Charge Density and Molecular  
Stacking Order of Polymer Semiconductors by Viologen  
Dopants for High Performance Organic Field-Effect Transistors**

Dong-Hyeon Lee,<sup>a</sup> Minji Kang,<sup>b</sup> Dae-Hee Lim,<sup>b</sup> Yunseul Kim,<sup>b</sup> Jiyoul Lee,<sup>a</sup> Dong-Yu Kim,<sup>b</sup>  
and Kang-Jun Baeg<sup>\*a</sup>

<sup>a</sup> *Department of Graphic Arts Information Engineering, Pukyong National University, 365  
Sinseon-ro, Nam-gu, Busan 48547, Republic of Korea*

<sup>b</sup> *School of Materials Science and Engineering, Gwangju Institute of Science and  
Technology (GIST), 123 Cheomdan-gwagiro, Buk-gu, Gwangju 61005, Republic of Korea*

E-mail: kangjun100@pknu.ac.kr (K.-J.B.)

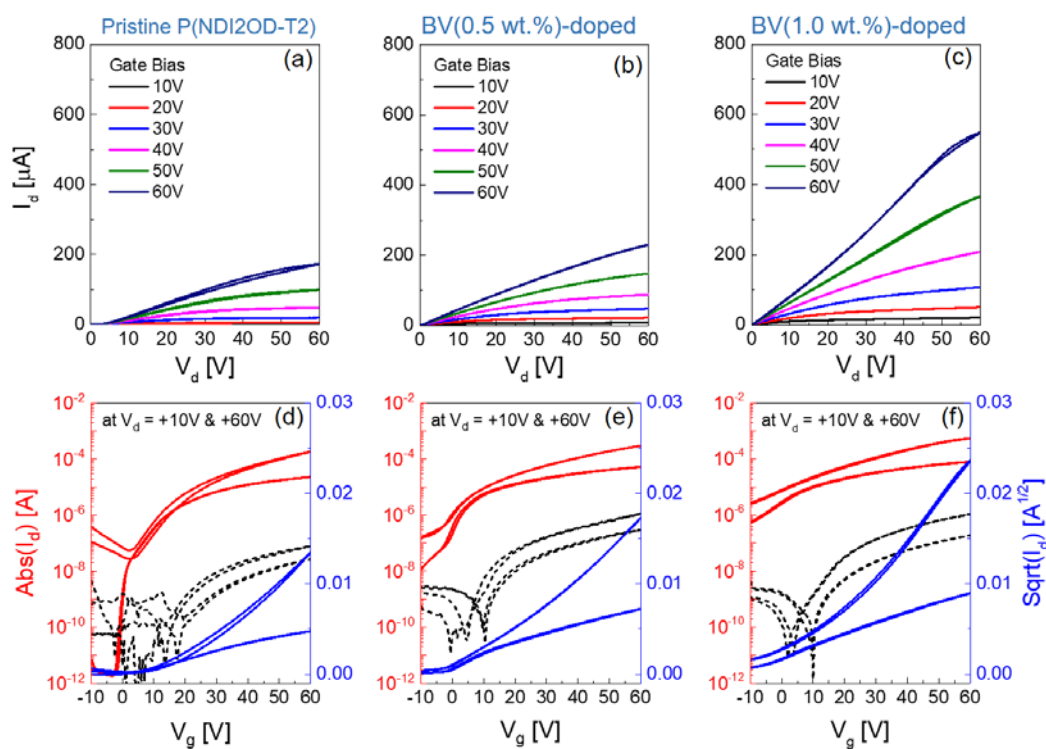

**Fig. S1.** (a-c) Output and (d-f) transfer curves of N-type OFETs based on (a,d) pristine, (b,e) BV(0.5 wt.%) -doped, and (c,f) BV(1.0 wt.%) -doped P(NDI2OD-T2).

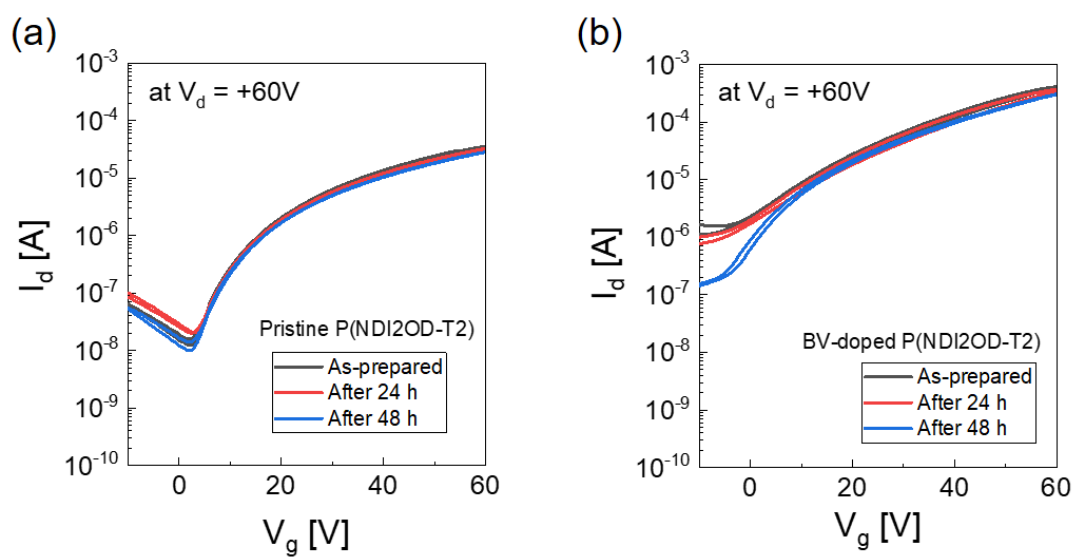

**Fig. S2.** Environmental stability test of pristine P(NDI2OD-T2) and BV(1.0 wt.%) -doped P(NDI2OD-T2) OFETs at the saturation region ( $V_d = +60$  V). The transfer curves were measured after storage in air for 24 and 48 hours.
